# Supplementary material for: MUG Mel3 Cell Lines Reflect Heterogeneity in Melanoma and Represent a Robust Model for Melanoma in Pregnancy
Source: MDPI journal article supplement (doi:10.3390/ijms222111318), 2021-10-20
Supplement: s1 [file s1]

## **Supporting information**

### **MUG Mel3 cell lines reflect the heterogeneity in melanoma and represent a robust model for melanoma in pregnancy**

Silke Schrom<sup>1</sup>, Thomas Hebesberger<sup>1</sup>, Stefanie Angela Wallner<sup>1</sup>, Ines Anders<sup>1</sup>, Erika Richtig<sup>2</sup>, Waltraud Brandl<sup>3</sup>, Birgit Hirschmugl<sup>3,11</sup>, Mariangela Garofalo<sup>4</sup>, Claudia Bernecker<sup>5</sup>, Peter Schlenke<sup>5</sup>, Karl Kashofer<sup>6</sup>, Christian Wadsack<sup>3,11</sup>, Ariane Aigelsreiter<sup>6</sup>, Ellen Heitzer<sup>7</sup>, Sabrina Riedl<sup>8,11,12</sup>, Dagmar Zweggler<sup>8,11,12</sup>, Nadine Kretschmer<sup>9</sup>, Georg Richtig<sup>10</sup> and Beate Rinner<sup>1, 11\*</sup>

<sup>1</sup>Division of Biomedical Research, Medical University of Graz, Graz, Austria

<sup>2</sup>Department of Dermatology, Medical University of Graz, Graz, Austria

<sup>3</sup>Department of Obstetrics and Gynecology, Medical University of Graz, Graz, Austria

<sup>4</sup>Department of Pharmaceutical and Pharmacological Sciences, University of Padova, Padova, Italy

<sup>5</sup>Department of Blood Group Serology and Transfusion Medicine, Medical University of Graz, Graz, Austria

<sup>6</sup>Institute of Pathology, Medical University of Graz, Graz, Austria

<sup>7</sup>Institute of Human Genetics, Diagnostic and Research Center for Molecular BioMedicine, Medical University of Graz, Graz, Austria

<sup>8</sup> Institute of Molecular Biosciences, Biophysics Division, University of Graz, Graz, Austria

<sup>9</sup>Institute of Pharmaceutical Sciences, Department of Pharmacognosy, University of Graz, Graz, Austria

<sup>10</sup>Division of Oncology, Medical University of Graz, Graz, Austria

<sup>11</sup>Bio-TechMed-Graz, Graz, Austria

<sup>12</sup>BioHealth, Graz, Austria

**Table S1: STR profiling.** STR profile for 16 loci are shown for comparison of tumor tissue (pigmented (P) and non-pigmented (NP)) to respective cell lines. Numbers in brackets describe losses for higher passages.

| STR-Locus             | D3S1358 | TH01 | D21S11 | D18S51 | Penta E | D5S818 | D13S317 | D7S820  |
|-----------------------|---------|------|--------|--------|---------|--------|---------|---------|
| Tumor tissue NP       | 14, 15  | 7, 8 | 30, 31 | 16, 18 | 7, 14   | 12, 13 | 11, 14  | 8, 12   |
| MUG Mel3 PF, p12, p54 | 14, 15  | 7, 8 | 30, 31 | 16, 18 | 7, 14   | 12, 13 | 11, 14  | 8, 12   |
| MUG Mel3 Ph, p5, p48  | 14, 15  | 7, 8 | 30, 31 | 16, 18 | 7, 14   | 12, 13 | 11, 14  | 8, (12) |
| MUG Mel3 NPF, p9, p48 | 14, 15  | 7, 8 | 30, 31 | 16, 18 | 7, 14   | 12, 13 | 11, 14  | 8, 12   |
| MUG Mel3 NPh, p7, p47 | 14, 15  | 7, 8 | 30, 31 | 16, 18 | 7, 14   | 12, 13 | 11, 14  | 8, 12   |

| STR-Locus             | D16S539  | CSF1PO | Penta D | Amelogenin | vWA    | D8S1179 | TPOX | FGA    |
|-----------------------|----------|--------|---------|------------|--------|---------|------|--------|
| Tumor tissue P        | 13       | 10, 13 | 9, 13   | X          | 16, 17 | 13      | 8, 9 | 22, 25 |
| Tumor tissue NP       | 12, 13   | 10, 13 | 9, 13   | X          | 16, 17 | 13      | 8, 9 | 22, 25 |
| MUG Mel3 PF, p12, p54 | 13       | 10, 13 | 9, 13   | X          | 16, 17 | 13      | 8, 9 | 22, 25 |
| MUG Mel3 Ph, p5, p48  | 13       | 10, 13 | 9, 13   | X          | 16, 17 | 13      | 8, 9 | 22, 25 |
| MUG Mel3 NPF, p9, p48 | 12, 13   | 10, 13 | 9, 13   | X          | 16, 17 | 13      | 8, 9 | 22, 25 |
| MUG Mel3 NPh, p7, p47 | (12), 13 | 10, 13 | 9, 13   | X          | 16, 17 | 13      | 8, 9 | 22, 25 |

**Table S2: Selected ICC markers for melanoma cell line characterization.** ICC markers HMB45, Melan-A, Tyrosinase, and melanoma chondroitin sulfate proteoglycan (MCSP) are listed with order number and dilutions used for staining of MUG Mel3 cell lines.

| Antibody   | Clone | Company         | Order Number | Dilution | Isotype        | Staining                               |
|------------|-------|-----------------|--------------|----------|----------------|----------------------------------------|
| Melanosome | HMB45 | Agilent<br>Dako | M0634        | 1:500    | mouse<br>IgG1  | cytoplasmic                            |
| Melan-A    | A103  | Agilent<br>Dako | M7196        | 1:200    | mouse<br>IgG1  | cytoplasmic /<br>perinuclear           |
| Tyrosinase | T311  | Agilent<br>Dako | M3623        | 1:100    | mouse<br>IgG2a | cytoplasmic<br>and / or<br>perinuclear |
| NG2 / MCSP | LHM-2 | R&D<br>Systems  | MAB2585      | 1:200    | mouse<br>IgG1  | plasma<br>membrane                     |

**Table S3: Forward and reverse primers used for qPCRs.**

| Gene    | Forward (5' - 3')      | Reverse (5' - 3')      | Product length |
|---------|------------------------|------------------------|----------------|
| Melan-A | ACAGTGATCCTGGGAGTCTTAC | TTGAAGAGACACTTTGCTGTCC | 168 bp         |
| SOX10   | AAGCTCTGGAGGCTGCTG     | CTTCCCGTTCTTCCGCCG     | 129 bp         |
| GAPDH   | TGGTATCGTGGAAGGACTCATG | AGTAGAGGCAGGGATGATGTTC | 130 bp         |
| ACTB    | GAACGGTGAAGGTGACAGCAG  | AGGATGGCAAGGGACTTCCTG  | 145 bp         |

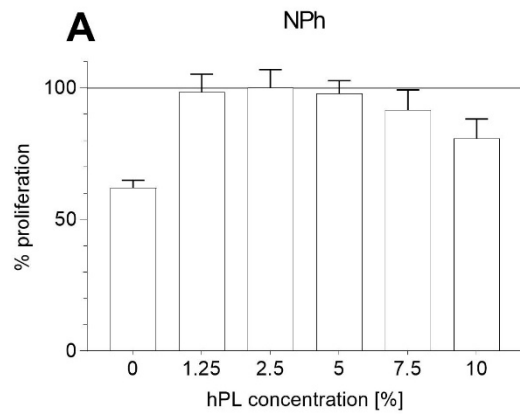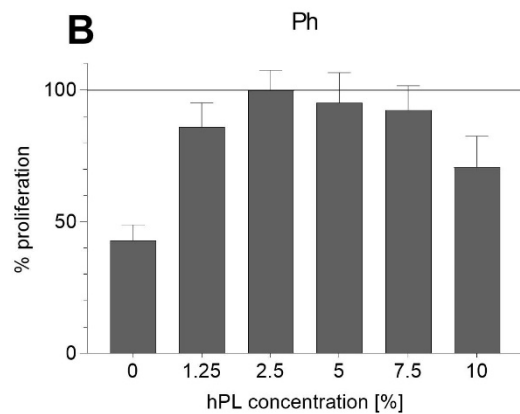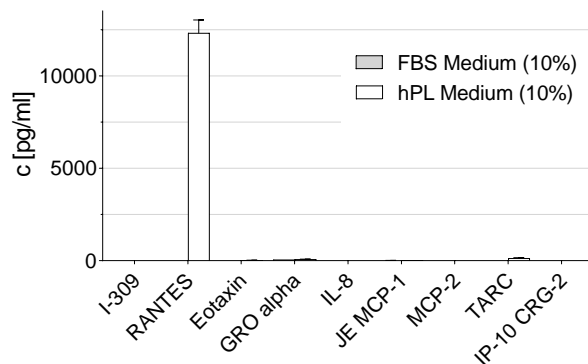

**Figure S1: percentage of proliferation for MUG Mel3 cell lines cultivated with different hPL concentrations.** A: MUG Mel3 NPh and B: MUG Mel3 Ph. OD-values highest at 2.5% hPL concentration were used as 100% proliferation. This experiment was conducted only once in six replicates and MTS was measured at 72 h.

**Figure S2: Human chemokine levels in media used for MUG Mel3 cell cultures.** Comparison of FBS and hPL supplemented media.

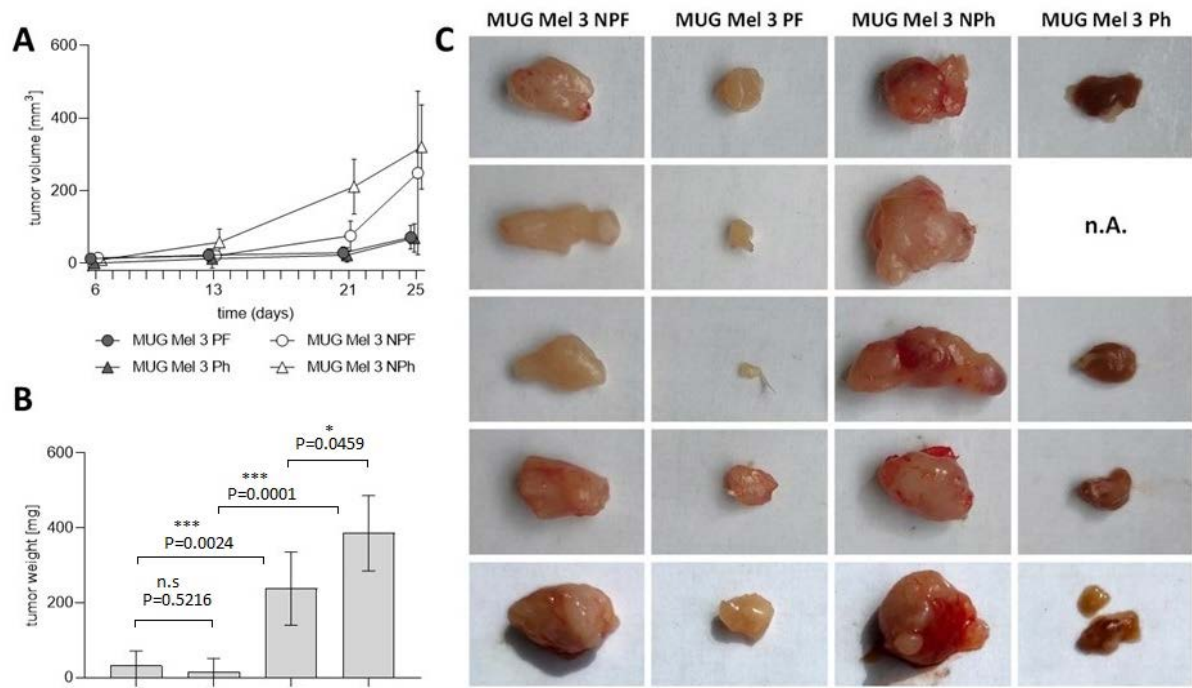

**Figure S3: Tumorigenic profile of all four cell lines in immunodeficient NXG mice.** Tumor volume [mm<sup>3</sup>] over time, significance was tested by comparing culture conditions (FBS or hPL) within cell line origin (pigmented or non-pigmented) and the origins of cells within the same cultivation method on day of sacrifice: MUG Mel3 NPh/MUG Mel3 NPF p-value=0.6413; MUG Mel3 NPh/MUG Mel3 Ph p-value=0.0002; MUG Mel3 PF/MUG Mel3 Ph p-value=0.9296 and MUG Mel3 NPF/MUG Mel3 PF p-value=0.0868. (A)tumor weight [mg] on day of sacrifice(B) are illustrated. Excised tumors of all mice are shown in C (n=5). High frequency ultrasound (HF-US) images of one representative mouse are presented in D. The images on day six were recorded with a 50 MHz (MX700) transducer; the images on day 25 with a 40 MHz (MX550D) transducer.



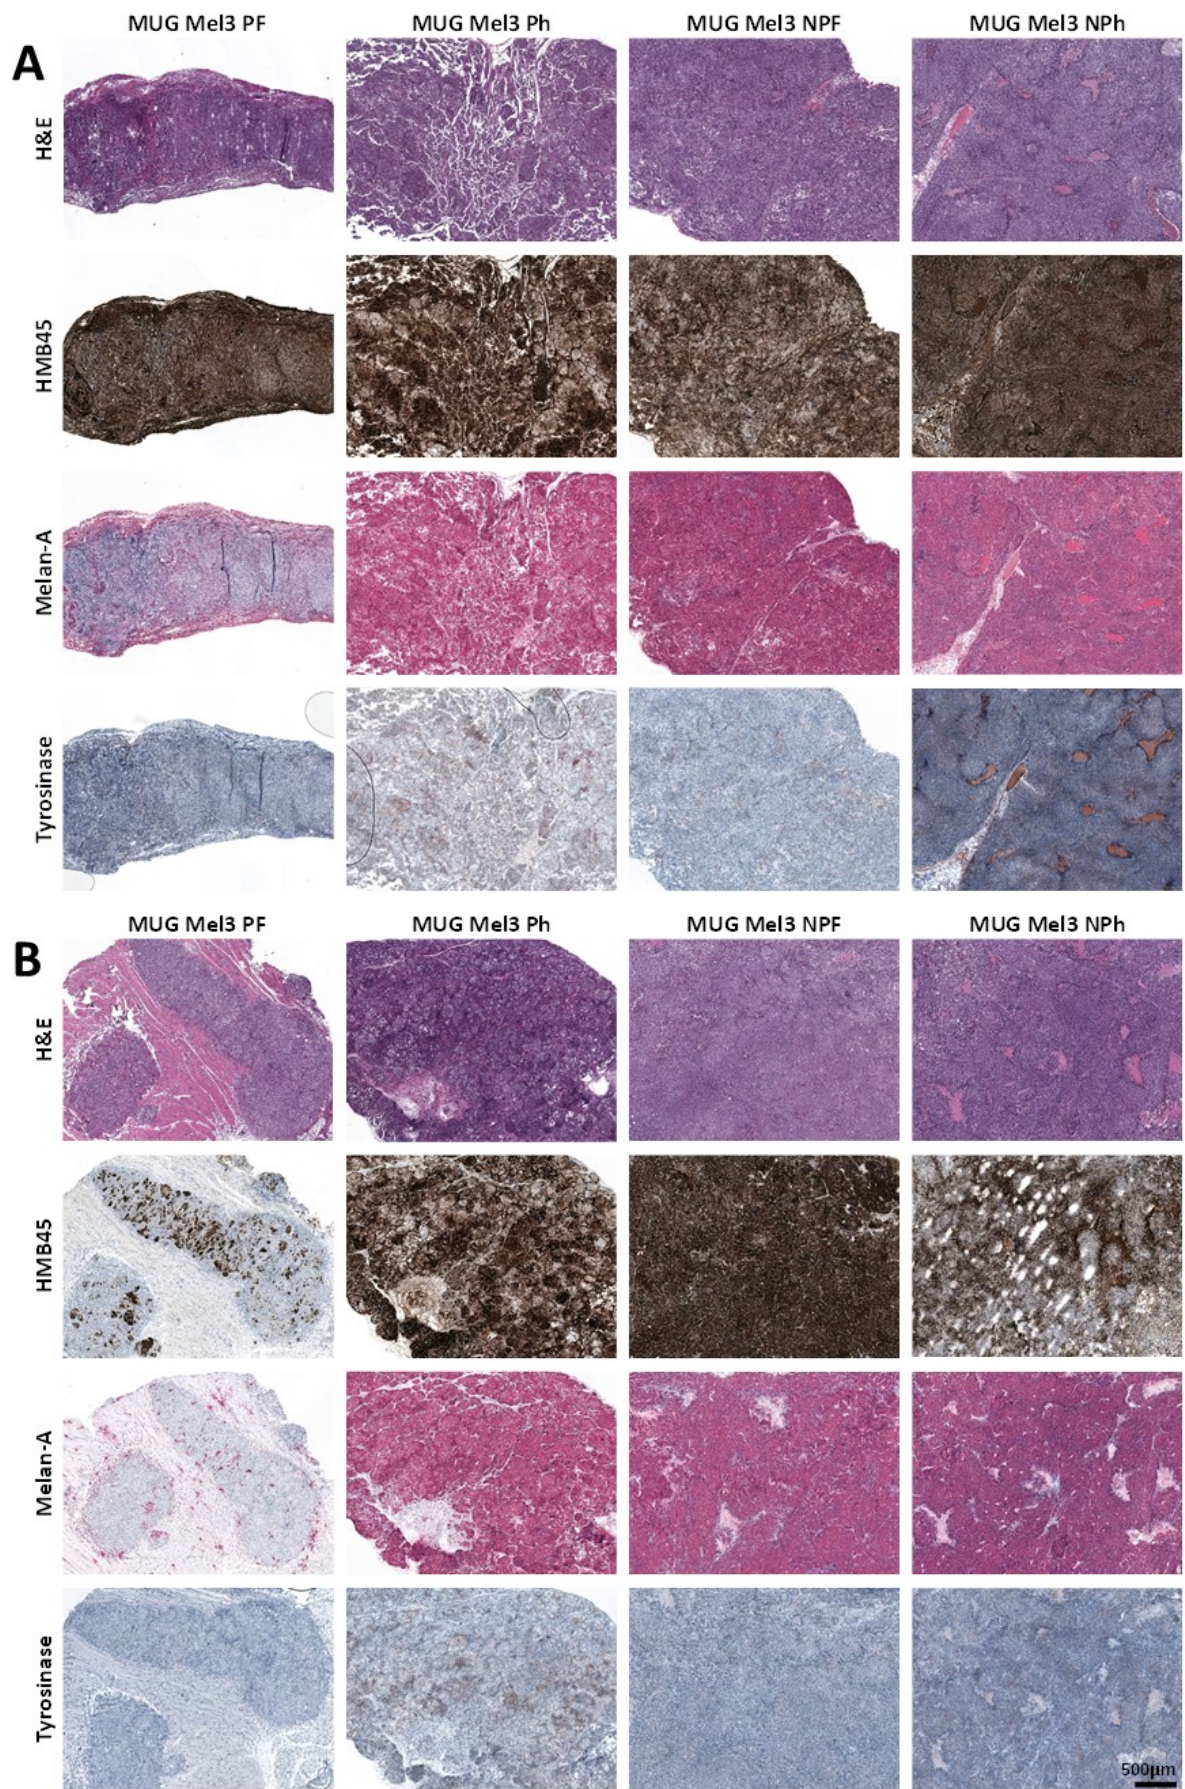

**Figure S4: IHC of MUG Mel3 cell lines grown in CR ATH HO nude mice (A) and NXG mice (B).** Tumor samples of one representative mouse are depicted showing staining for H&E, HMB45, Melan-A, and Tyrosinase.

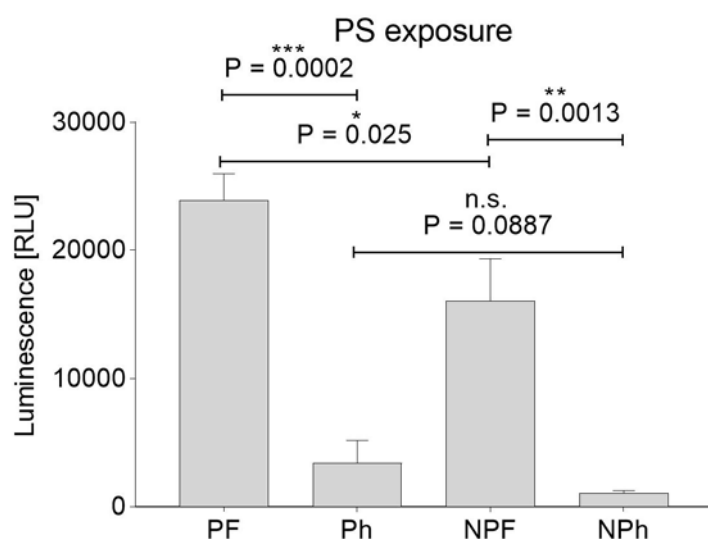

**Figure S5: Expression of PS exposure measured by luminescence.** PS exposure was measured using the RealTime-Glo™ Annexin V Apoptosis Assay from Promega. Measured PS levels of MUG Mel 3 were statistically significant lower in hPL containing medium compared to FBS. Experiments were performed at least three times. RLU: relative Luminescence.
